# Supplementary figures and images for: Not exclusively the activity, but the sweet spot: a dehydrogenase point mutation synergistically boosts activity, substrate tolerance, thermal stability and yield
Source: Royal Society of Chemistry journal article supplement (doi:10.1039/d4ob00211c), 2024-01-01

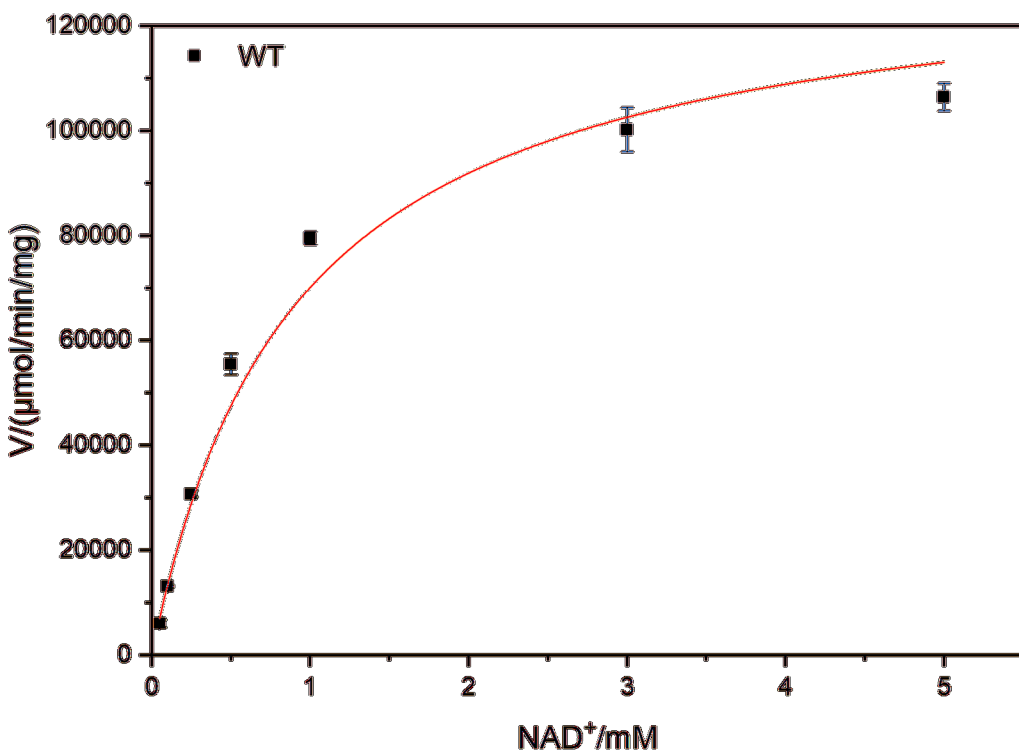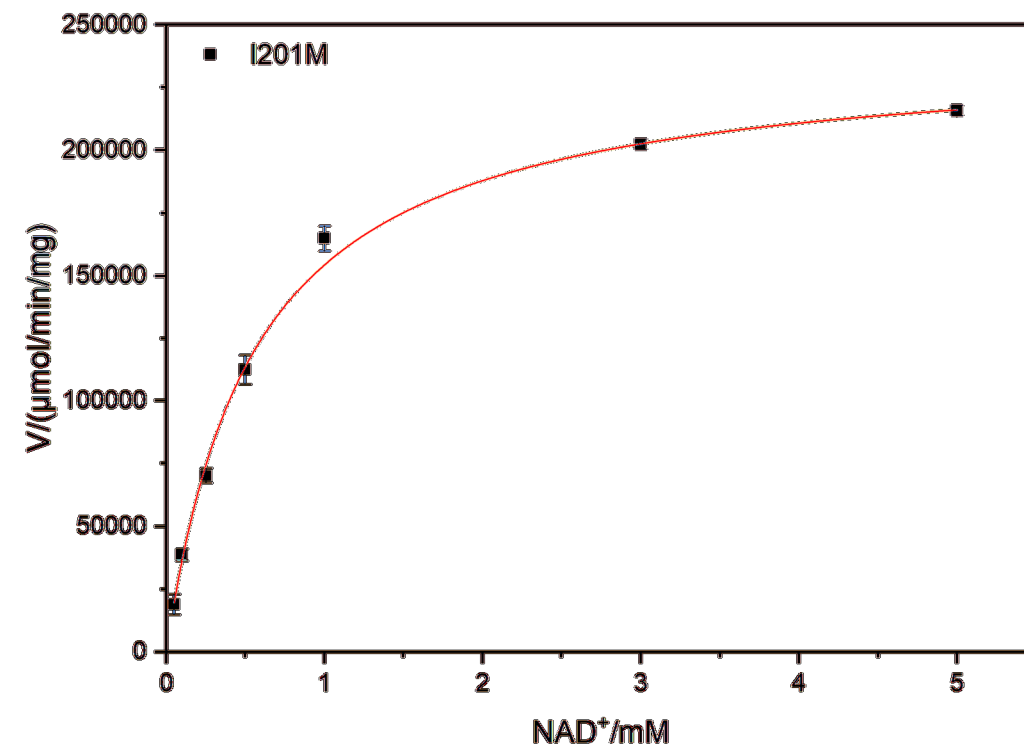

Supplement: d4ob00211c3.pdf [file d4ob00211c3.pdf]

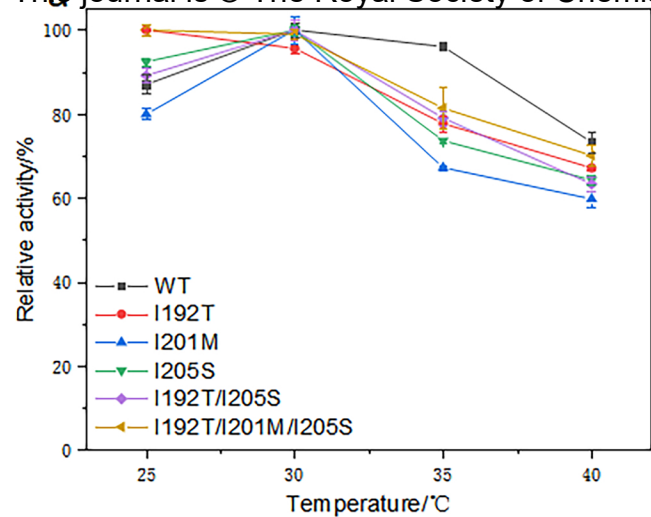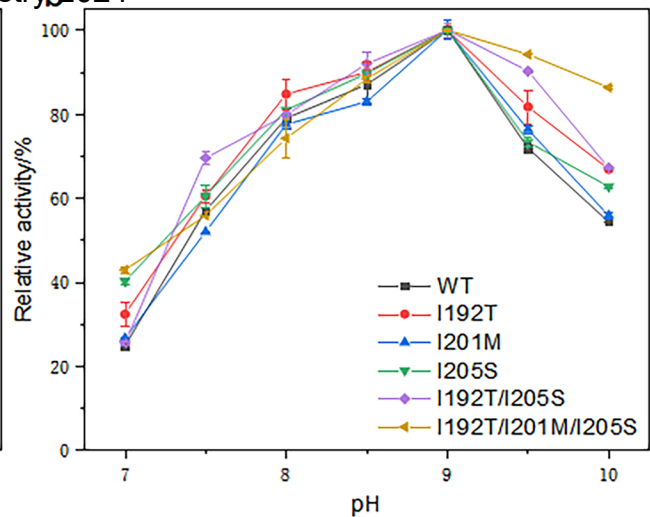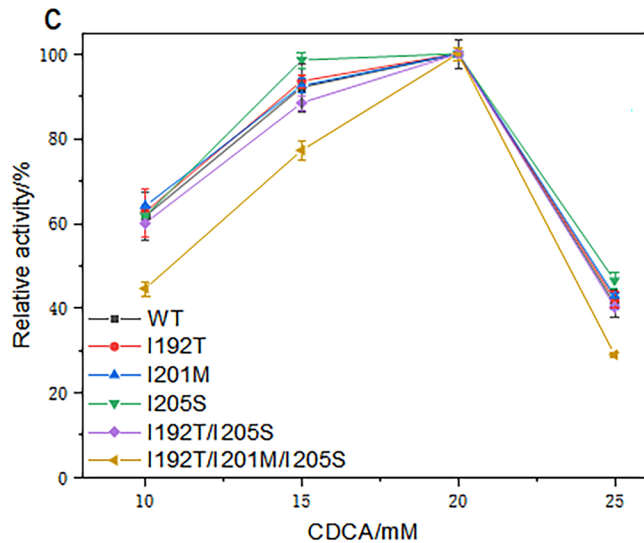

Supplement: d4ob00211c4.pdf [file d4ob00211c4.pdf]

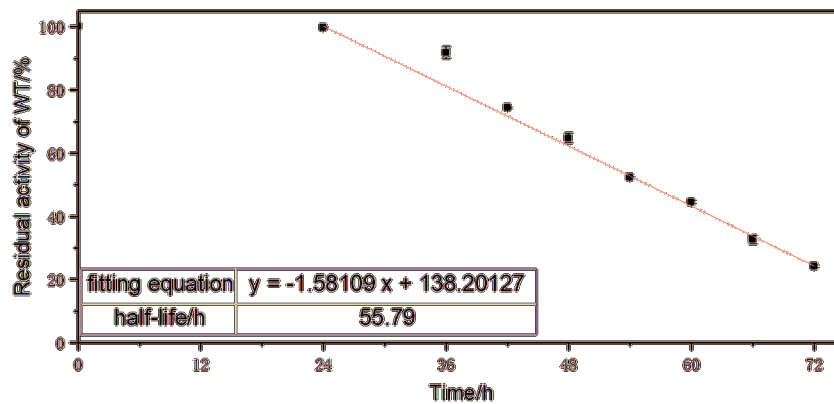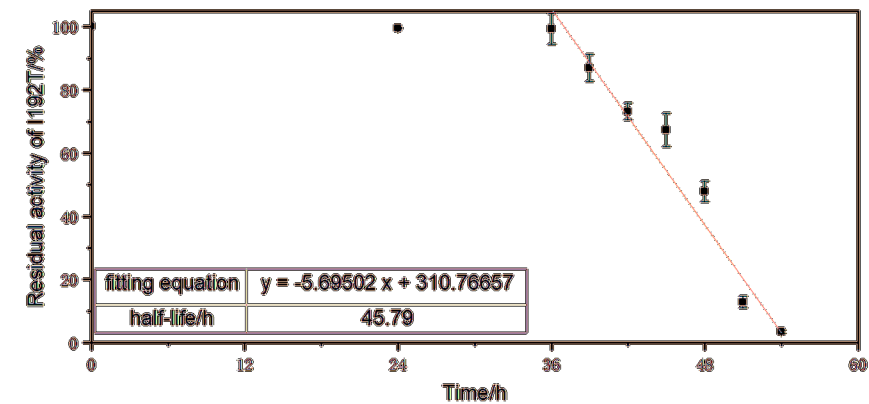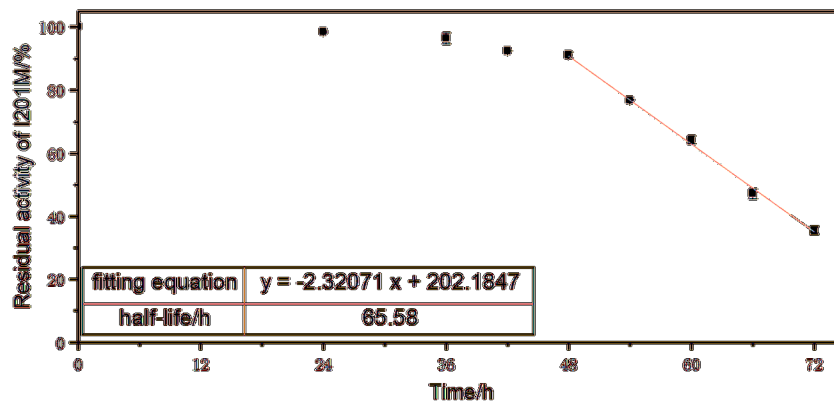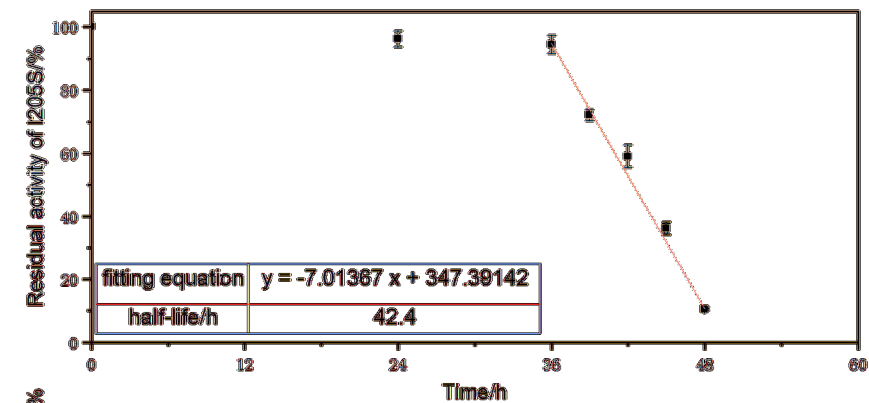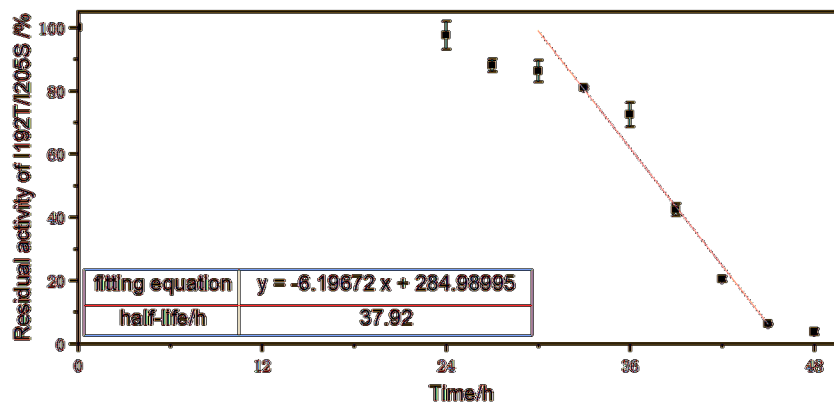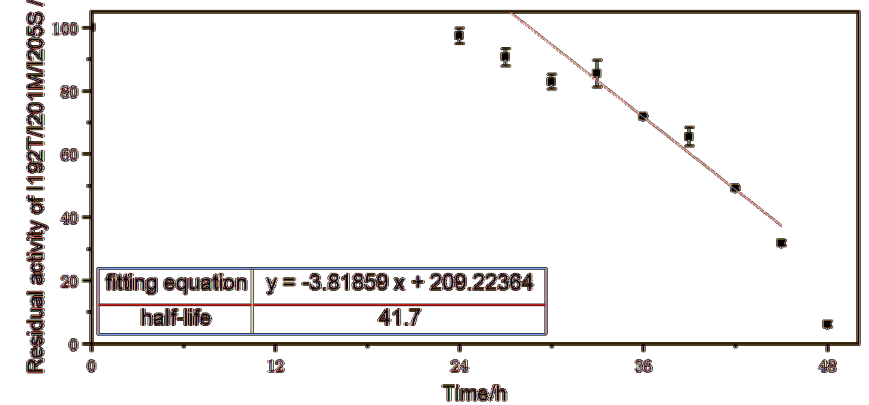

Supplement: d4ob00211c5.pdf [file d4ob00211c5.pdf]

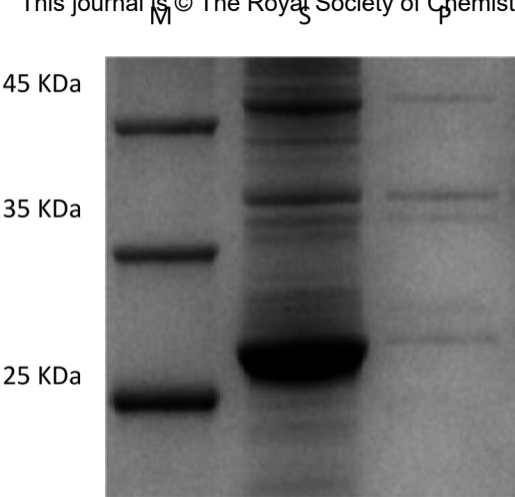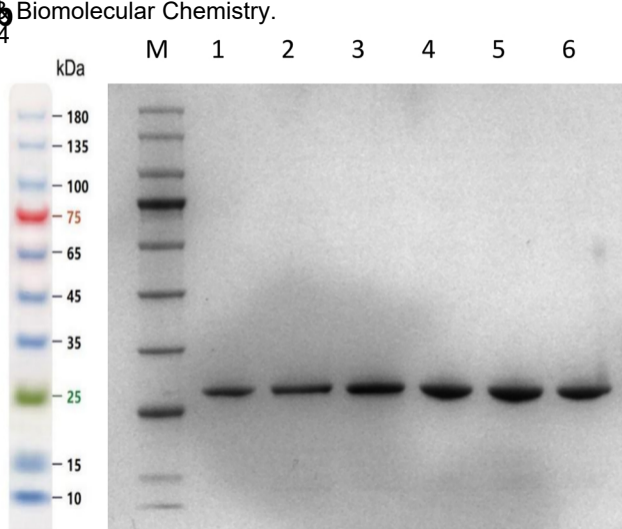

Supplement: d4ob00211c6.pdf [file d4ob00211c6.pdf]
